# Supplementary material for: Patients’ Preferences Related to Benefits, Risks, and Formulations of Schizophrenia Treatment
Source: Atypon-hosted journal article supplement (doi:10.1176/appi.ps.201400188), 2015-03-16
Supplement: appi.ps.201400188.ds001.pdf [file appi.ps.201400188.ds001.pdf]

**Example Main Choice Question (Male Patient)**

**Remember:** Pat is 40 years old and has been treated for schizophrenia for 20 years now. Pat currently lives with his sister and has a good relationship with his doctor. Pat has no other health problems.

Pat’s doctor could prescribe one of two possible medicines for him. The table below shows the results of each of these medicines **after one year**.

| Pat on Medicine A after 1 year                                                                                                               | Pat on Medicine B after 1 year                                                                                                                                                                        |                       |
|----------------------------------------------------------------------------------------------------------------------------------------------|-------------------------------------------------------------------------------------------------------------------------------------------------------------------------------------------------------|-----------------------|
| No unusual beliefs, doesn't hear voices, trusts people<br>Speaks rarely and slowly, rarely shows emotion<br>No interest in social activities | Thinks people are stealing from them, often hears voices, doesn't trust people<br>Speaks only when asked, shows no emotion<br>Less interest in social activities (noticed by family or close friends) |                       |
| 15-pound weight gain over the past year<br>Muscle stiffness or shaking<br>Problems getting & maintaining erections<br>Normal blood sugar     | 30-pound weight gain over the past year<br>No muscle problems<br>No problems with erections<br>Has high blood sugar that can lead to diabetes                                                         |                       |
|                                                                                                                                              | <b>Medicine A</b>                                                                                                                                                                                     | <b>Medicine B</b>     |
| Which medicine is <b>better</b> for Pat?                                                                                                     | <input type="radio"/>                                                                                                                                                                                 | <input type="radio"/> |

### Example Additional Choice Question With Follow-Up

Thinking again about Pat, please answer the question below. The medicines are the same except as shown below. Pat typically never misses taking his medicine.

|                                                                 | Medicine A                                                                                                                                                    | Medicine B                                                                                                                                                      |
|-----------------------------------------------------------------|---------------------------------------------------------------------------------------------------------------------------------------------------------------|-----------------------------------------------------------------------------------------------------------------------------------------------------------------|
| How Pat takes the medicine                                      | Pill once a day                                                                                                                                               | Injection once every 3 months                                                                                                                                   |
| Having unusual beliefs, hearing voices, and not trusting people | <p><b>Mild:</b> 4 out of 10 (40%)<br/> <b>Severe:</b> 6 out of 10 (60%)</p> 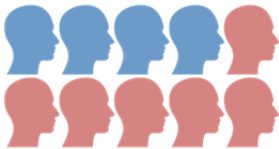 | <p><b>Mild:</b> 5 out of 10 (50%)<br/> <b>Severe:</b> 5 out of 10 (50%)</p>  |

|                                          | Medicine A                       | Medicine B            |
|------------------------------------------|----------------------------------|-----------------------|
| Which medicine is <b>better</b> for Pat? | <input checked="" type="radio"/> | <input type="radio"/> |

**Now consider Jamie:** Jamie is a patient like Pat who agrees with your choice above, but Jamie misses his pills **once or twice a week**.

|                                            | Medicine A            | Medicine B                       |
|--------------------------------------------|-----------------------|----------------------------------|
| Which medicine is <b>better</b> for Jamie? | <input type="radio"/> | <input checked="" type="radio"/> |

|                                                                 | Medicine A                                                                                                                                     | Medicine B                                                                                                                                       |
|-----------------------------------------------------------------|------------------------------------------------------------------------------------------------------------------------------------------------|--------------------------------------------------------------------------------------------------------------------------------------------------|
| How Pat takes the medicine                                      | Pill once a day                                                                                                                                | Injection once every 3 months                                                                                                                    |
| Having unusual beliefs, hearing voices, and not trusting people | <p>Mild: 4 out of 10 (40%)<br/>Severe: 6 out of 10 (60%)</p> 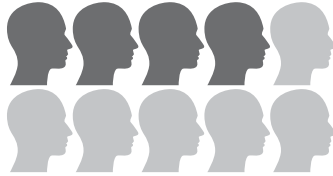 | <p>Mild: 5 out of 10 (50%)<br/>Severe: 5 out of 10 (50%)</p>  |

|                                          | Medicine A                       | Medicine B            |
|------------------------------------------|----------------------------------|-----------------------|
| Which medicine is <b>better</b> for Pat? | <input checked="" type="radio"/> | <input type="radio"/> |

**Now consider Jamie:** Jamie is a patient like Pat who agrees with your choice above, but Jamie misses his pills **once or twice a week**.

|                                            | Medicine A            | Medicine B                       |
|--------------------------------------------|-----------------------|----------------------------------|
| Which medicine is <b>better</b> for Jamie? | <input type="radio"/> | <input checked="" type="radio"/> |

| Pat on Medicine A after 1 year                                                                                                                                  | Pat on Medicine B after 1 year                                                                                                                                                                                       |
|-----------------------------------------------------------------------------------------------------------------------------------------------------------------|----------------------------------------------------------------------------------------------------------------------------------------------------------------------------------------------------------------------|
| <p>No unusual beliefs, doesn't hear voices, trusts people</p> <p>Speaks rarely and slowly, rarely shows emotion</p> <p>No interest in social activities</p>     | <p>Thinks people are stealing from them, often hears voices, doesn't trust people</p> <p>Speaks only when asked, shows no emotion</p> <p>Less interest in social activities (noticed by family or close friends)</p> |
| <p>15-pound weight gain over the past year</p> <p>Muscle stiffness or shaking</p> <p>Problems getting &amp; maintaining erections</p> <p>Normal blood sugar</p> | <p>30-pound weight gain over the past year</p> <p>No muscle problems</p> <p>No problems with erections</p> <p>Has high blood sugar that can lead to diabetes</p>                                                     |

|                                          | Medicine A            | Medicine B            |
|------------------------------------------|-----------------------|-----------------------|
| Which medicine is <b>better</b> for Pat? | <input type="radio"/> | <input type="radio"/> |
